# Supplementary material for: Determinants of the Financial Contribution to the NHS: The Case of the COVID-19 Emergency in Italy
Source: Frontiers journal article supplement (doi:10.3389/fpsyg.2020.584473), 2020-11-13
Supplement: Table_1.DOCX [file Table_1.DOCX]

Table 1. Descriptive statistics for dependent and independent variables.

| Variable | Group | M | SD | Md | A | K |
| --- | --- | --- | --- | --- | --- | --- |
| Intention to make a financial contribution to the NHS | Tax group | 5.6 | 3.1 | 6 | -0.4 | -0.9 |
| Donation group | 7.3 | 2.6 | 8 | -1.0 | 0.4 |
| Pandemic attitude | Tax group | 5.8 | 1.3 | 5.8 | -0.8 | 0.7 |
| Donation group | 5.7 | 1.2 | 6 | -0.6 | 0.3 |
| Accessibility | Tax group | 7.7 | 1.3 | 8 | -1.3 | 1.9 |
| Donation group | 7.6 | 1.5 | 8 | -1.5 | 1.6 |
| Personal Gain | Tax group | 6.7 | 1.7 | 7 | -0.8 | 0.4 |
| Donation group | 6.3 | 2.0 | 6.7 | -0.7 | -0.3 |
| Collectivism | Tax group | 3.8 | 0.6 | 3.8 | -0.3 | 0.7 |
| Donation group | 3.8 | 0.6 | 3.8 | -0.2 | 0.3 |
| Trust towards the National Healthcare System (NHS) | Tax group | 4.0 | 0.8 | 4 | -1.1 | 1.5 |
| Donation group | 3.9 | 0.7 | 4 | -1.0 | 1.2 |
| Trust towards public institutions | Tax group | 3.1 | 0.9 | 3 | -0.3 | -0.7 |
| Donation group | 3.0 | 0.9 | 3 | -0.3 | -0.5 |
| Trust in money management | Tax group | 5.7 | 2.8 | 6 | -1.2 | 0.6 |
| Donation group | 7.0 | 2.6 | 7 | -1.0 | -0.7 |
